# Supplementary material
Source: PubMed Central journal article supplement (PMC4793355)
Supplement: dals009787.ww1_default.pdf [file dals009787.ww1_default.pdf]

**Supplementary table A** Multivariable model of comorbidities, historical symptoms and physical examination candidate predictor variables identified for reduction in final multivariable model

| Predictor                          | Random controls<br>(n=265)*     | Age matched controls<br>(n=265)* |
|------------------------------------|---------------------------------|----------------------------------|
| <b>Comorbidities</b>               |                                 |                                  |
| Asthma                             | 0.6 (0.2 to 1.7)                | 1.2 (0.4 to 3.7)                 |
| Chronic lung disease               | 14.3 (1.4 to 150)               | 4.8 (0.9 to 25.4)                |
| Heart disease                      | †                               | 8.9 (0.5 to 146.8)               |
| Cerebral palsy/developmental delay | 10.0 (1.5 to 66.1)              | 37.6 (4.8 to 296)                |
| <b>Current illness</b>             |                                 |                                  |
| Dyspnoea                           | 3.0 (0.9 to 10.4)               | 1.5 (0.4 to 5.6)                 |
| Increased/purulent sputum          | 10.3 (0.8 to 127)               | 0.9 (0.1 to 8.4)                 |
| Generalised weakness               | 3.6 (0.6 to 21.5)               | †                                |
| Irritable/drowsy                   | 4.2 (1.0 to 17.8)               | 4.1 (1.0 to 17.3)                |
| Rhinorrhoea                        | 1.7 (0.6 to 4.9)                | 0.6 (0.2 to 1.7)                 |
| <b>Physical examination</b>        |                                 |                                  |
| Heart rate* (linear)**             | 1.00 (0.17 to 1.83)             | -0.081 (-0.18 to 0.014)          |
| Heart rate* (quadratic)**          | -0.0073 (-0.013 to -0.0013)     | 0.00041 (0.00003 to 0.0008)      |
| Heart rate* (cubic)**              | 0.000017 (0.000005 to 0.000031) | -                                |
| On oxygen or saturation <93%       | 7.1 (2.0 to 24.8)               | 10.3 (2.8 to 38.2)               |
| Chest retractions                  | 7.4 (1.9 to 29.1)               | 7.7 (1.3 to 45.7)                |
| Accessory muscle use               | †                               | 1.7 (0.3 to 9.7)                 |
| Signs of dehydration               | 8.1 (1.3 to 51.2)               | 7.4 (1.3 to 44.0)                |

Data are odds ratio (95% CI). C statistic for model using random controls 0.933; c statistic for model using age matched controls 0.921.

\*Random control results adjusted for site, age matched control results adjusted for site and age, using conditional logistic regression; for non-linear continuous predictor variables, effect reported as parameter estimates (95% CI) for linear, quadratic, and cubic terms.

†Not identified as significant in initial multivariable models.

\*\*Heart rate term for final multivariable model includes adjustment for age (random control model odds ratio 0.7 (95% CI 0.6 to 0.9); age matched control model odds ratio 1.4 (95% CI 1.0 to 2.0)).

**Supplementary table B** Final multivariable models generated in sensitivity analysis

| <b>Predictor</b>                   | <b>Random controls<br/>(n=265)*</b> | <b>Age matched controls<br/>(n=265)*</b> |
|------------------------------------|-------------------------------------|------------------------------------------|
| Chronic lung disease               | 8.7 (1.3 to 57.6)                   | ‡                                        |
| Cerebral palsy/developmental delay | 7.2 (1.2 to 42.8)                   | 22.1 (3.5 to 140)                        |
| Dyspnoea                           | 4.5 (1.3 to 15.4)                   | ‡                                        |
| Irritable/drowsy                   | 4.5 (1.1 to 17.8)                   | ‡                                        |
| Heart rate >90th centile for age   | 3.7 (1.1 to 12.0)                   | ‡                                        |
| On oxygen or saturation <93%       | 4.3 (1.3 to 14.1)                   | 38.0 (4.4 to 330)                        |
| Chest retractions                  | 6.3 (1.7 to 23.1)                   | 10.4 (3.4 to 31.8)                       |

\*Random control results adjusted for site, age matched control results adjusted for site and age, using conditional logistic regression; data are odds ratio (95% CI); data are generated from non-imputed datasets with heart rate and respiratory rate dichotomised in order to generate more clinically-meaningful odds ratios rather than odds ratios per change in unit from modelling; c statistic for model using random controls 0.92; c statistic for model using age matched controls 0.886.

‡Not identified as significant in final model.
